# Supplementary material for: Test of general relativity by a pair of transportable optical lattice clocks
Source: Springer Nature journal article supplement (doi:10.1038/s41566-020-0619-8), 2020-04-06
Supplement: 41566_2020_619_MOESM1_ESM.pdf [file 41566_2020_619_MOESM1_ESM.pdf]

In the format provided by the authors and unedited.

# Test of general relativity by a pair of transportable optical lattice clocks

Masao Takamoto<sup>1,2</sup>, Ichiro Ushijima<sup>3</sup>, Noriaki Ohmae<sup>1,2</sup>, Toshihiro Yahagi<sup>4</sup>, Kensuke Kokado<sup>4</sup>, Hisaaki Shinkai<sup>5</sup> and Hidetoshi Katori<sup>1,2,3</sup>✉

---

<sup>1</sup>Quantum Metrology Laboratory, RIKEN, Wako, Saitama, Japan. <sup>2</sup>Space-Time Engineering Research Team, RIKEN, Wako, Saitama, Japan. <sup>3</sup>Department of Applied Physics, Graduate School of Engineering, The University of Tokyo, Bunkyo-ku, Tokyo, Japan. <sup>4</sup>Geospatial Information Authority of Japan, Tsukuba, Ibaraki, Japan. <sup>5</sup>Osaka Institute of Technology, Kitayama, Hirakata, Osaka, Japan. ✉e-mail: [katori@amo.t.u-tokyo.ac.jp](mailto:katori@amo.t.u-tokyo.ac.jp)

## Supplementary Information for

# Test of General Relativity by a Pair of Transportable Optical Lattice Clocks

Masao Takamoto<sup>1,2</sup>, Ichiro Ushijima<sup>3</sup>, Noriaki Ohmae<sup>1,2</sup>, Toshihiro Yahagi<sup>4</sup>, Kensuke Kokado<sup>4</sup>, Hisaaki Shinkai<sup>5</sup> & Hidetoshi Katori<sup>1,2,3\*</sup>

<sup>1</sup> *Quantum Metrology Laboratory, RIKEN, Wako, Saitama 351-0198, Japan.*

<sup>2</sup> *Space-Time Engineering Research Team, RIKEN, Wako, Saitama 351-0198, Japan.*

<sup>3</sup> *Department of Applied Physics, Graduate School of Engineering, The University of Tokyo, Bunkyo-ku, Tokyo 113-8656, Japan.*

<sup>4</sup> *Geospatial Information Authority of Japan, Tsukuba, Ibaraki 305-0811, Japan.*

<sup>5</sup> *Osaka Institute of Technology, Kitayama, Hirakata, Osaka 573-0198, Japan.*

### 1. Stability of redshift measurement

The frequency difference between two clocks at TOKYO SKYTREE is shown in Fig. S1a, whose Allan deviation is shown in Fig. S1b.

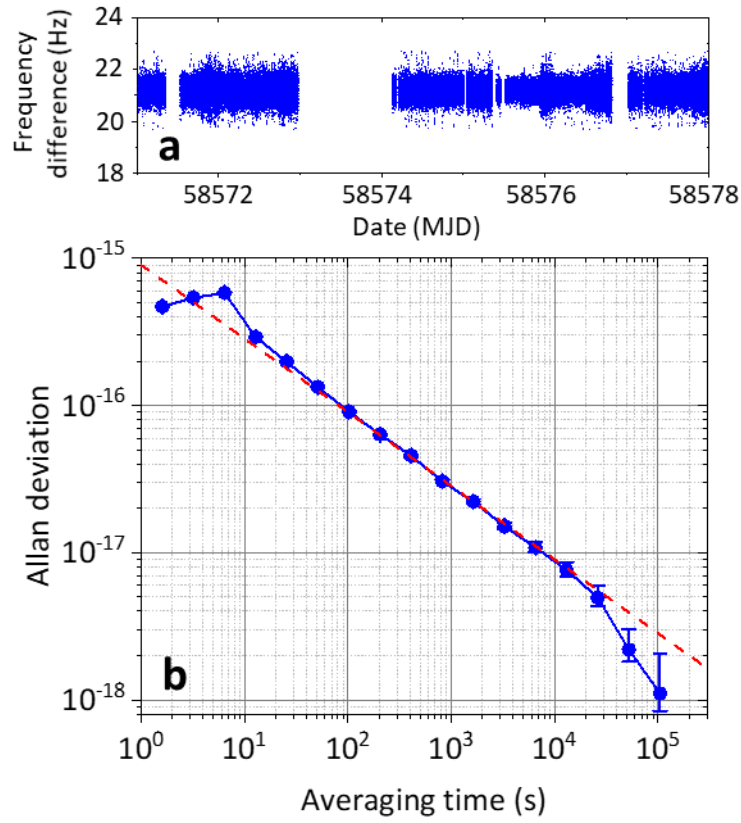

**Figure S1 | Frequency difference and Allan deviation.** **a**, Frequency difference is measured for  $\sim 3.6 \times 10^5$  s in total in 7 days. **b**, Allan deviation of the frequency difference of two clocks follows  $\sigma_y(\tau) = 9 \times 10^{-16}(\tau/s)^{-1/2}$ , calculated by combining the full data shown in Fig. S1a. The error bars represent the  $1\sigma$  statistical uncertainty.

## 2. Transition diagram of $^{87}\text{Sr}$ for clock experiment

Figure S2 shows the relevant transitions of  $^{87}\text{Sr}$  used in this experiment.

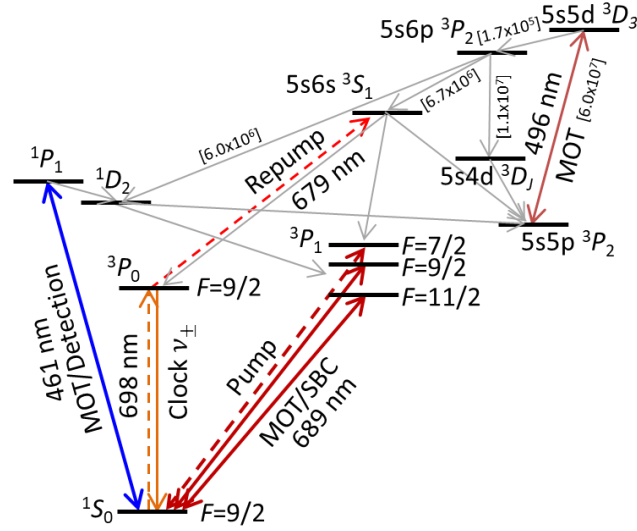

**Figure S2 | Relevant transitions of  $^{87}\text{Sr}$ .** Numbers in angle brackets show radiative decay rates in units of  $\text{s}^{-1}$ .

### 3. Uncertainty budgets

**Table S1 | Corrections and uncertainties for a single clock ( $\nu_1$ ) and those in beat note measurement ( $\Delta\nu$ ). Numbers are listed in units of  $10^{-18}$ .**

| Effect                    | Corr. (Unc.) for<br>clock $\nu_1$ | Corr. (Unc.) for<br>grav. redshift $\Delta\nu$ |
|---------------------------|-----------------------------------|------------------------------------------------|
| BBR shift                 | 2315.3 (2.6)                      | 0.0 (1.9)                                      |
| Quadratic Zeeman shift    | 242.4 (0.3)                       | 0.03 (<0.01)                                   |
| Lattice light shift       | -1.1 (0.8)                        | -0.37 (1.4)                                    |
| Probe light shift         | 73.5 (4.5)                        | 0.0 (2.8)                                      |
| Density shift             | -0.3 (1.3)*                       | **                                             |
| First order Doppler shift | 0.0 (0.5)                         | 0.0 (0.8)                                      |
| AOM chirp & switching     | 0.0 (0.2)                         | 0.0 (0.3)                                      |
| Background gas collision  | 5.4 (1.0)                         | 0.0 (1.2)                                      |
| Systematic total          | 2635.2 (5.5)                      | -0.34 (4.0)                                    |

\*Calculated for a typical atom number of 1,500.

\*\*Density shift is dynamically corrected by monitoring the number of atoms as described in Methods.

#### 4. Summary of height measurement

**Table S2 | Summary of height measurement between two clocks  
conducted in MJD 58,414-58,417 and 58,420-58,422 (October 2018)**

| Period<br>(MJD) | GNSS (m)    | Laser<br>ranging<br>(m) | Levelling<br>(m) | Ruler and<br>radar<br>(m) | Total (m)   |
|-----------------|-------------|-------------------------|------------------|---------------------------|-------------|
| 58,414.125      | 460.613(39) |                         | -7.935(2)        | -0.029(1)                 | 452.649(39) |
| -58,417.125     |             | 431.651(10)             | 20.406(2)        | 0.575(8)                  | 452.632(13) |
| 58,420.125      | 460.616(39) |                         | -7.935(2)        | -0.029(1)                 | 452.652(39) |
| -58,422.125     |             | 431.650(10)             | 20.406(2)        | 0.575(8)                  | 452.631(13) |
